# Supplementary material for: Like Soldiers on the Front – A Qualitative Study Understanding the Frontline Healthcare Professionals’ Experience of Treating and Caring for Patients With&nbsp;COVID-19
Source: Research Square preprint supplement (doi:10.21203/rs.3.rs-130659/v1), 2021-01-07
Supplement: Supplementary file 1 [file b33f55a56fda13597ded1fc3.docx]

**Interview questions**

Could you please tell about:

- What thoughts you had before you embarked on the task/job?
- What it means for you to care for / treat patients with COVID-19 - both professionally and personally?
- How you have experienced the collaboration with colleagues during the period?
- What thoughts you have had about infection? (at work/at home/in society)
